# Supplementary material for: Assessing branched tetraether lipids as tracers of soil organic carbon transport through the Carminowe Creek catchment (southwest England)
Source: Copernicus journal article supplement (doi:10.5194/bg-2019-500), 2020-03-11
Supplement: Supplementary file [file bg-2019-500-AC1-supplement.pdf]

Table1. BIT values along 14 transects (Tx indicates the transect number, and Sx indicates the sample point, where 1 represents the hilltop and subsequent numbers are further downslope).

|           | BIT | North catchment |      |      |      |      |      |      |             | South catchment |      |      |      |      |      |
|-----------|-----|-----------------|------|------|------|------|------|------|-------------|-----------------|------|------|------|------|------|
|           |     | T1              | T2   | T3   | T4   | T5   | T6   | T7   | T8          | T9              | T10  | T11  | T12  | T13  | T14  |
| hilltop   | S1  | <b>0.65</b>     | 0.66 | 0.77 | 0.97 | 0.99 | 0.97 | 0.77 | <b>0.58</b> | 0.92            | 0.92 | 0.84 | 0.95 | 0.84 | 0.86 |
|           | S2  | <b>0.57</b>     | 0.66 | 0.86 | 0.99 | 0.99 | 0.93 | 0.65 | <b>0.59</b> | 0.91            | 0.63 | -    | -    | 0.73 | 0.88 |
|           | S3  | <b>0.73</b>     | 0.77 | 0.87 | 1.00 | 1.00 | 0.94 | 0.82 | <b>0.80</b> | 0.98            | 0.90 | 0.92 | 0.98 | 0.91 | 0.88 |
|           | S4  | <b>0.88</b>     | 0.83 | 0.96 | 0.99 | -    | 0.96 | 0.70 | <b>0.85</b> | 1.00            | 0.92 | 0.72 | 0.98 | 0.92 | 0.86 |
|           | S5  | <b>0.95</b>     | -    | -    | -    | -    | 0.97 | 0.76 | <b>0.98</b> | 1.00            | 0.91 | 0.91 | 1.00 | 0.91 | 0.93 |
|           | S6  | -               | -    | -    | -    | -    | 0.96 | 0.94 | <b>0.97</b> | 1.00            | 0.93 | 0.85 | -    | 0.90 | -    |
|           | S7  | -               | -    | -    | -    | -    | -    | 0.81 | -           | 0.95            | -    | 0.92 | -    | -    | -    |
| downslope | S8  | -               | -    | -    | -    | -    | -    | -    | -           | -               | -    | 0.92 | -    | -    | -    |
